# Supplementary material for: Facile synthesis of nitrogen-doped carbon derived from polydopamine-coated Li3V2(PO4)3as cathode material for lithium-ion batteries
Source: Royal Society of Chemistry journal article supplement (doi:10.1039/c4ra05089d), 2014-01-01
Supplement: c4ra05089d1.pdf [file c4ra05089d1.pdf]

## Electronic Supplementary Information

### Facile Synthesis of Nitrogen-doped Carbon Derived from Polydopamine Coated

### $\text{Li}_3\text{V}_2(\text{PO}_4)_3$ as Cathode Materials for Lithium-Ion Batteries

*Cunliang Zhang,<sup>a, b</sup> Hongshen Li,<sup>a</sup> Nie Ping,<sup>a</sup> Gang Pang,<sup>a</sup> Guiyin Xu,<sup>a</sup> Xiaogang Zhang<sup>\*a</sup>*

<sup>a</sup> College of Material Science & Engineering, Key Laboratory for Intelligent Nano Materials and Devices of Ministry of Education, Nanjing University of Aeronautics and Astronautics, Nanjing, 210016, PR China. E-mail: azhangxg@163.com.

<sup>b</sup>Shangqiu Polytechnic, Shangqiu, 476000, PR China

### Synthesis of carbon coated $\text{Li}_3\text{V}_2(\text{PO}_4)_3$ (LVP/C)

In order to investigate the effects of nitrogen doped carbon coating accurately, a comparative experiment was carried out as follows [1]: Typically, 0.5g LVP was dispersed in a solution of 0.15g glucose dissolved in 30ml de-ionized water. The mixture was transferred into a 50 mL Teflon-lined stainless steel autoclave and then placed in an oven at 180 °C for 3 h. Finally the precipitate was collected, washed with de-ionized water and then annealed in a tube under  $\text{N}_2$  atmosphere at 750 °C for 4 h after drying.

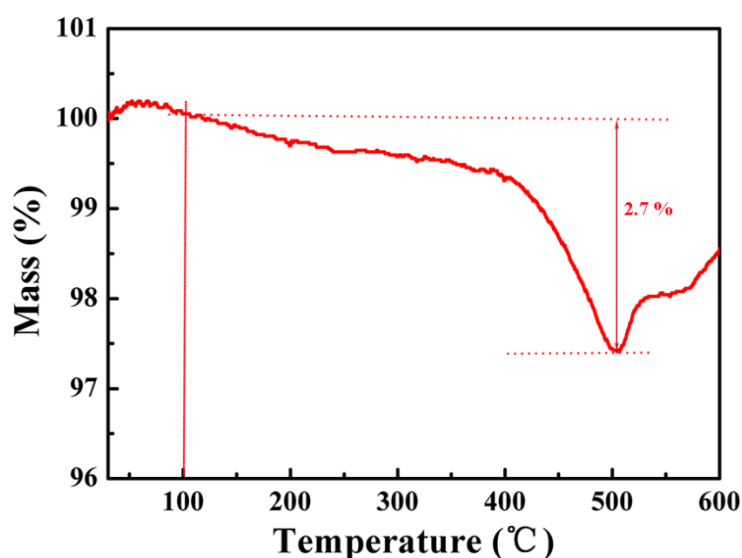

**Fig. S1** TG curve of the LVP/C measured at 10 °C min<sup>-1</sup> in air.

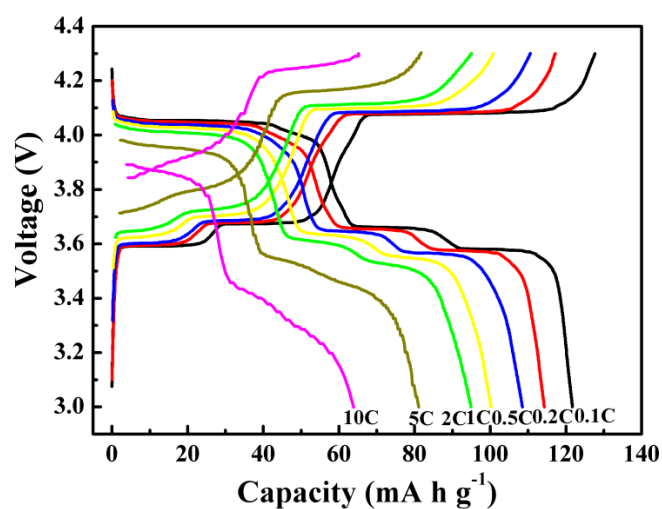

**Fig.S2** Charge-discharge curves for LVP/C over a potential window of 3-4.3 V at various rates.

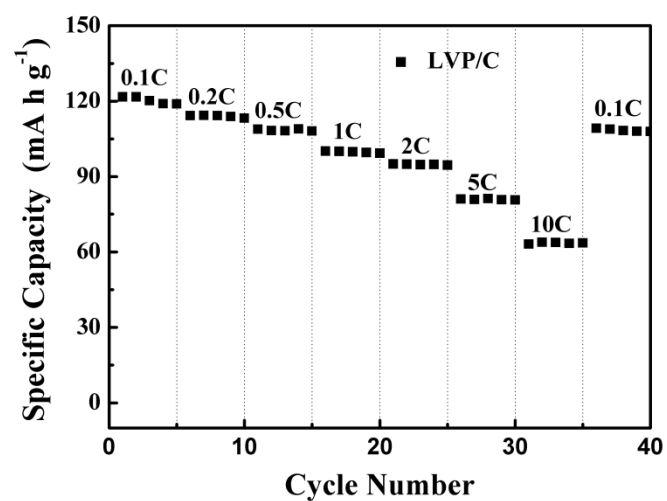

**Fig. S3** The rate performances of the LVP/C sample at different current rates over a potential window of 3-4.3 V.

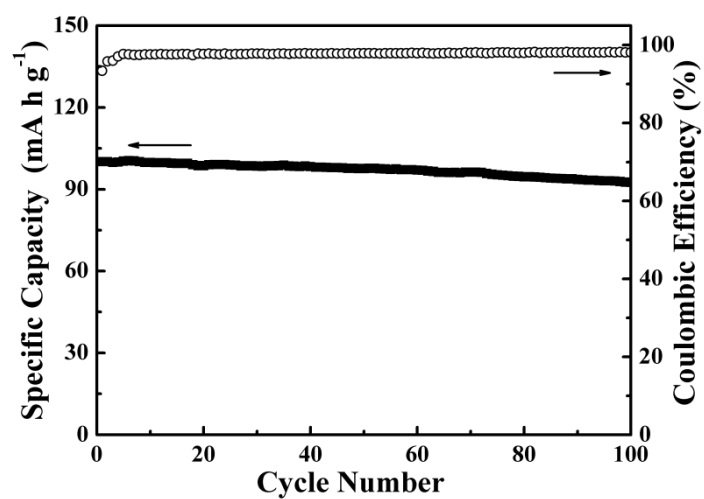

**Fig.S4** The cyclability and Coulombic efficiency of the LVP/C sample at 1 C.

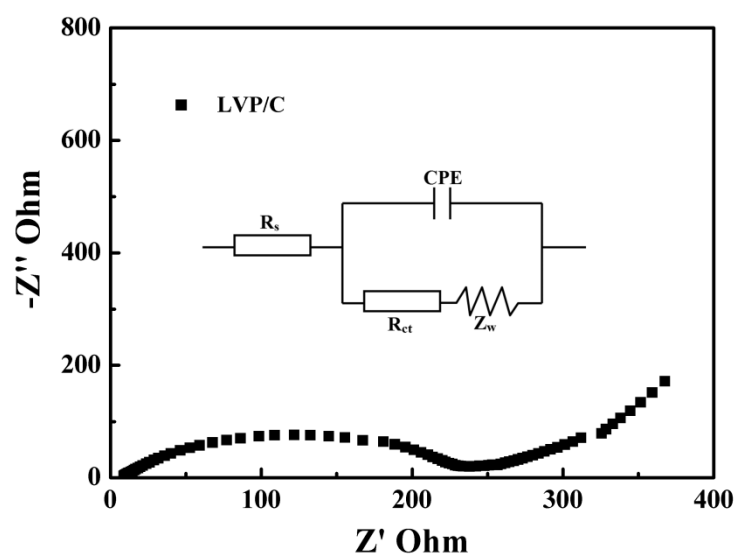

**Fig.S5** EIS spectra for LVP/C with the frequency range of 100 kHz to 0.01Hz after five full cycles at 0.1 C.

**TableS1** Various resistances of LVP/C cell after five full cycles at 0.1 C.

| Samples | $R_s(\Omega)$ | $R_{ct}(\Omega)$ |
|---------|---------------|------------------|
| LVP/C   | 5.75          | 221              |

## Reference

- 1 X. M. Sun, and Y. D.Li, *Angew. Chem. Int. Ed.*, 2004, **43**, 597
